# Supplementary material for: The ecological effects of selective decontamination of the digestive tract (SDD) on antimicrobial resistance: a 21-year longitudinal single-centre study
Source: Springer Nature journal article supplement (doi:10.1186/s13054-019-2480-z), 2019-06-07
Supplement: MOESM1 [file 16781656]

|       | 3rd gen Cephalosporins |                 |       | Polymyxine B/Colestin |                 |       | Aminoglycosides    |                 |       | Ciprofloxacin      |                 |       |
|-------|------------------------|-----------------|-------|-----------------------|-----------------|-------|--------------------|-----------------|-------|--------------------|-----------------|-------|
|       | number of isolates     | isolates tested | %     | number of isolates    | isolates tested | %     | number of isolates | isolates tested | %     | number of isolates | isolates tested | %     |
| 1997  | 541                    | 424             | 78,4% | 517                   | 112             | 21,7% | 685                | 540             | 78,8% | 685                | 537             | 78,4% |
| 1998  | 542                    | 451             | 83,2% | 504                   | 104             | 20,6% | 734                | 592             | 80,7% | 734                | 590             | 80,4% |
| 1999  | 610                    | 508             | 83,3% | 578                   | 199             | 34,4% | 779                | 657             | 84,3% | 779                | 652             | 83,7% |
| 2000  | 494                    | 420             | 85,0% | 437                   | 152             | 34,8% | 605                | 516             | 85,3% | 605                | 515             | 85,1% |
| 2001  | 613                    | 506             | 82,5% | 654                   | 265             | 40,5% | 833                | 689             | 82,7% | 833                | 687             | 82,5% |
| 2002  | 843                    | 766             | 90,9% | 809                   | 385             | 47,6% | 1094               | 1003            | 91,7% | 1094               | 1002            | 91,6% |
| 2003  | 708                    | 643             | 90,8% | 634                   | 358             | 56,5% | 867                | 791             | 91,2% | 867                | 789             | 91,0% |
| 2004  | 784                    | 718             | 91,6% | 713                   | 407             | 57,1% | 951                | 879             | 92,4% | 951                | 877             | 92,2% |
| 2005  | 843                    | 769             | 91,2% | 815                   | 454             | 55,7% | 1057               | 976             | 92,3% | 1057               | 977             | 92,4% |
| 2006  | 915                    | 845             | 92,3% | 919                   | 514             | 55,9% | 1236               | 1131            | 91,5% | 1236               | 1130            | 91,4% |
| 2007  | 1002                   | 920             | 91,8% | 978                   | 444             | 45,4% | 1254               | 1155            | 92,1% | 1254               | 1154            | 92,0% |
| 2008  | 911                    | 868             | 95,3% | 885                   | 431             | 48,7% | 1191               | 1133            | 95,1% | 1191               | 1133            | 95,1% |
| 2009  | 976                    | 915             | 93,8% | 962                   | 542             | 56,3% | 1246               | 1177            | 94,5% | 1246               | 1178            | 94,5% |
| 2010  | 1020                   | 977             | 95,8% | 1017                  | 718             | 70,6% | 1226               | 1176            | 95,9% | 1226               | 1176            | 95,9% |
| 2011  | 853                    | 812             | 95,2% | 876                   | 853             | 97,4% | 1075               | 1052            | 97,9% | 1075               | 1051            | 97,8% |
| 2012  | 919                    | 903             | 98,3% | 972                   | 959             | 98,7% | 1173               | 1156            | 98,6% | 1173               | 1154            | 98,4% |
| 2013  | 789                    | 757             | 95,9% | 850                   | 826             | 97,2% | 1067               | 1040            | 97,5% | 1067               | 1040            | 97,5% |
| 2014  | 852                    | 822             | 96,5% | 810                   | 798             | 98,5% | 1056               | 1025            | 97,1% | 1056               | 1025            | 97,1% |
| 2015  | 688                    | 673             | 97,8% | 705                   | 690             | 97,9% | 897                | 879             | 98,0% | 897                | 879             | 98,0% |
| 2016  | 832                    | 824             | 99,0% | 849                   | 844             | 99,4% | 1050               | 1041            | 99,1% | 1050               | 1041            | 99,1% |
| 2017  | 429                    | 425             | 99,1% | 408                   | 404             | 99,0% | 513                | 509             | 99,2% | 513                | 509             | 99,2% |
| total | 16164                  | 14946           | 92,5% | 15892                 | 10459           | 65,8% | 20589              | 19117           | 92,9% | 20589              | 19096           | 92,7% |
